# Supplementary material
Source: HighWire-hosted journal article supplement (http://www.qdcxjkg.com/highwire/filestream/113862/field_highwire_adjunct_files/0/ERJ-00917-2012_Disclosures.pdf)
Supplement: ERJ-00917-2012_Disclosures.pdf [file ERJ-00917-2012_Disclosures.pdf]

**A.R. Koczulla** has acted as an expert witness on the subject of this study on electronic noses.
